# Supplementary material
Source: PubMed Central journal article supplement (PMC2951207)

A

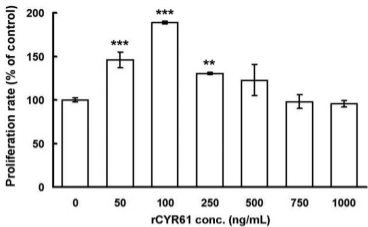

B

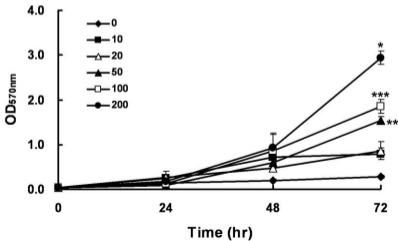

Supplement: supp_M109.087122_Supple_Figure_S1.pdf [file supp_M109.087122_Supple_Figure_S1.pdf]

### BMP-2 ELISA assay

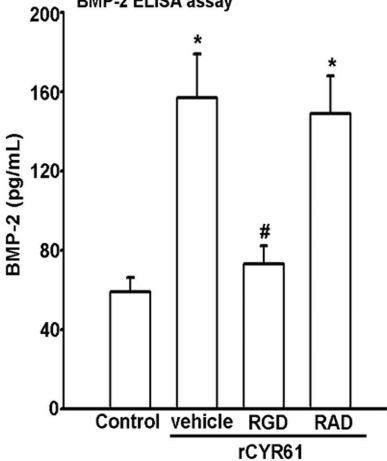

Supplement: supp_M109.087122_Supple_Figure_S2.pdf [file supp_M109.087122_Supple_Figure_S2.pdf]
